# Supplementary material
Source: HighWire-hosted journal article supplement (https://adc.bmj.com/content/archdischild-2017-314081)
Supplement: inline-supplementary-material-4 [file inline-supplementary-material-4.docx]

**Supplementary file 4: Detailed description of discordant pairs of calprotectin and calgranulin-C results (n=31).**

Attending paediatrians were blinded for the viral PCR result, which explains the discrepancy in diagnosis in the lowest five patients.

| **DISCORDANT RESULTS LOW CALPROTECTIN - HIGH CALGRANULIN-C** | | | | | |
| --- | --- | --- | --- | --- | --- |
| **Calprotectin (µg/g)** | **Calgranulin-C (µg/g)** | **Bacterial and parasite PCR** | **IBD risk stratum** | **Diagnosis** | **Post-hoc viral PCR** |
| 315 | 1.22 | negative | High | CD | negative |
| 340 | 1.03 | D. fragilis | High | CD | negative |
| 150 | 1.06 | Giardia lamblia | High | GI-infection | negative |
| 165 | 3.17 | D. fragilis | High | GI-infection | negative |
| 105 | 1.98 | negative | High | IBS | negative |
| 220 | 1.11 | negative | High | IBS | negative |
| 255 | 1.82 | D. fragilis | Low | IBS | negative |
| 40 | 8.04 | negative | Low | HUS | negative |
| 345 | 1.62 | D. fragilis | High | solitary rectal ulcer | negative |
| **DISCORDANT RESULTS HIGH CALPROTECTIN - LOW CALGRANULIN-C** | | | | | |
| **Calprotectin (µg/g)** | **Calgranulin-C (µg/g)** | **Bacterial and parasite PCR** | **IBD risk stratum** | **Diagnosis** | **Post hoc viral PCR** |
| 480 | 0.42 | D. fragilis | High | UC | negative |
| 510 | 0.23 | STEC | High | CD | negative |
| 855 | 0.49 | negative | High | CD | negative |
| 980 | 0.24 | negative | High | CD | negative |
| 1170 | 0.54 | negative | High | UC | negative |
| 1270 | 0.33 | negative | High | CD | negative |
| 1280 | 0.22 | negative | High | CD | negative |
| 1410 | 0.22 | D. fragilis | High | UC | negative |
| 1440 | 0.22 | negative | High | CD | negative |
| 1660 | 0.26 | negative | High | CD | negative |
| 2080 | 0.68 | negative | High | CD | negative |
| 645 | 0.22 | STEC | High | GI-infection | negative |
| 1120 | 0.53 | negative | High | spontaneous recovery | negative |
| 1370 | 0.24 | Giardia lamblia | Low | GI-infection | negative |
| 1380 | 0.22 | STEC | Low | GI-infection | negative |
| 2550 | 0.22 | negative | Low | GI-infection | negative |
| 580 | 0.22 | negative | Low | allergy | negative |
| 585 | 0.58 | STEC, D. fragilis, | High | IBS | parechovirus |
| 1160 | 0.22 | D. fragilis | High | IBS | adenovirus |
| 685 | 0.22 | negative | Low | reflux oesophagitis | adenovirus |
| 1150 | 0.22 | negative | High | spontaneous recovery | norovirus |
| 2510 | 0.24 | D. fragilis | Low | spontaneous recovery | norovirus |

CD, Crohn;s disease; GI-infection, gastrointestinal infection; HUS, haemolytic uraemic syndrome; IBS, irritable bowel syndrome; STEC, shiga toxin-producing E. coli; UC, ulcerative colitis
