# Supplementary material
Source: HighWire-hosted journal article supplement (https://adc.bmj.com/content/archdischild-2017-314081)
Supplement: inline-supplementary-material-5 [file inline-supplementary-material-5.docx]

**Supplementary file 5: Stacked bars representing percentage of patients referred to specialist services for endoscopy and diagnosed with IBD per calprotectin range.**
